# Supplementary material for: Application of HPLC-NMR in the Identification of Plocamenone and Isoplocamenone from the Marine Red Alga Plocamium angustum
Source: Mar Drugs. 2012 Sep 24;10(9):2089–102. doi: 10.3390/md10092089 (PMC3475275; doi:10.3390/md10092089)
Supplement: Supplementary File 1: — PDF-Document (PDF, 318 KB) [file marinedrugs-10-02089-s001.pdf]

## Supplementary Information

**Figure S1.** Stop-flow HPLC-NMR WET 2-D gCOSY NMR spectrum of plocamenone (**4**).

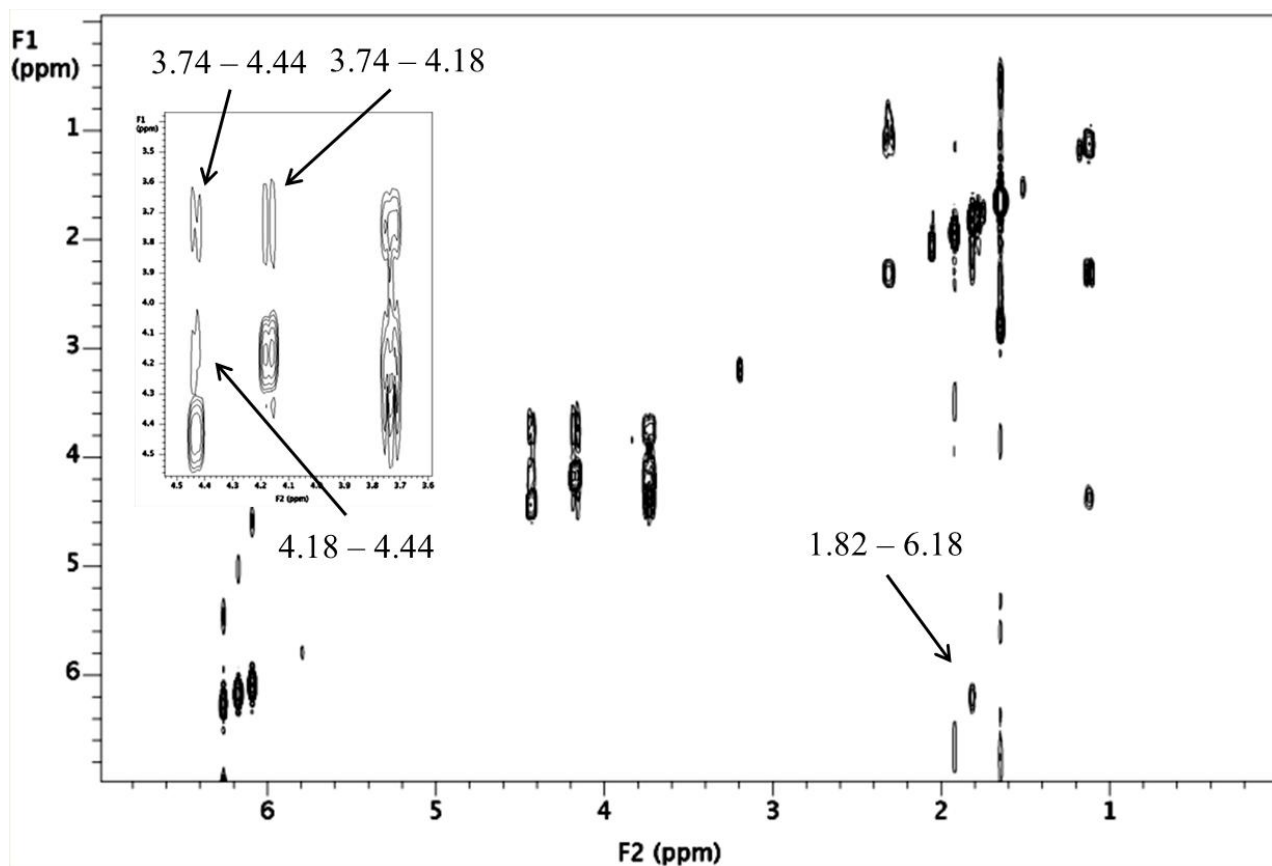

**Figure S2.** Stop-flow HPLC-NMR WET 2D gHSQCAD NMR spectrum of plocamenone (**4**).

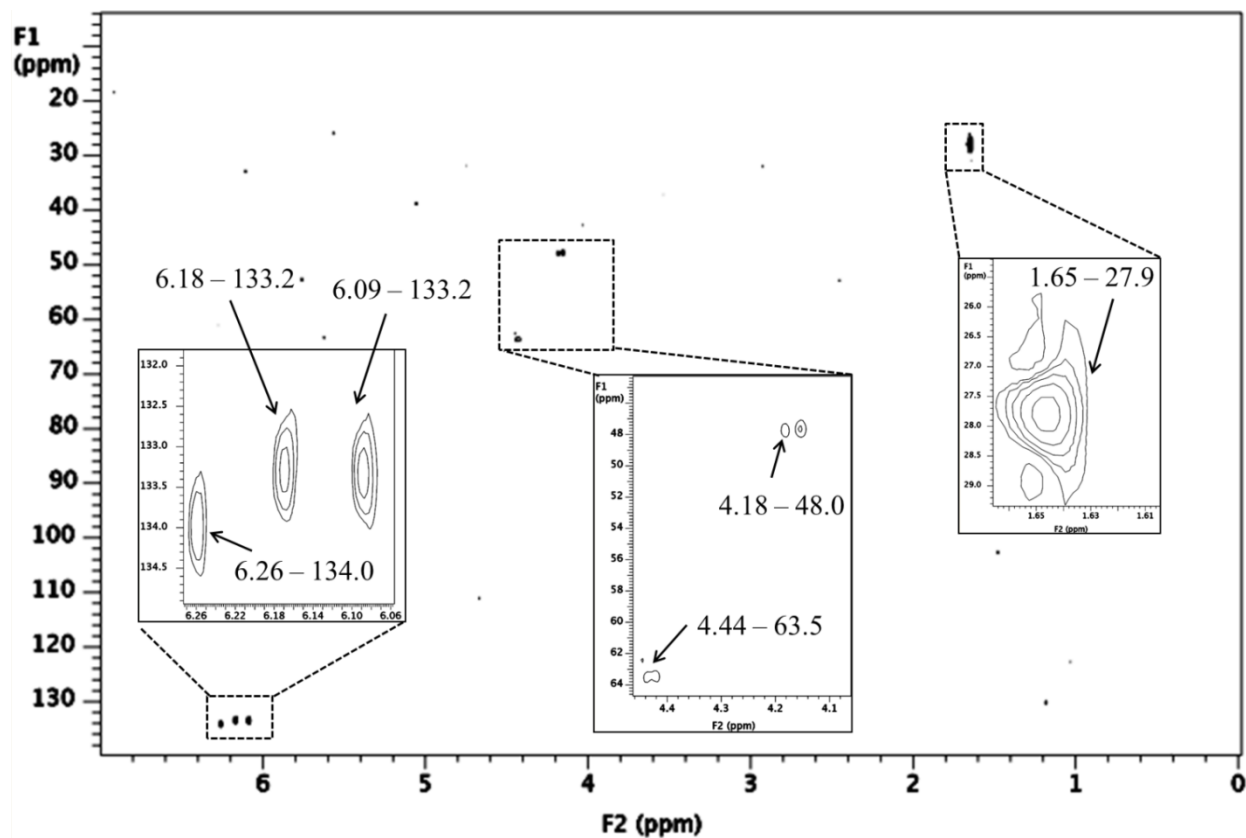

*HPLC-NMR Characterization of Plocamenone (4) and Isoplocamenone (5)*

HPLC-NMR assignment of plocamenone (**4**) from stop-flow HPLC-NMR: HPLC-NMR ( $^1\text{H}$ , 500 MHz, as detailed in the *Results and Discussion*,  $\delta$ , ppm): 6.26 (s, H-5), 6.18 (s, H-1b), 6.09 (s, H-1a), 4.44 (dd,  $J = 2.5, 9.5$  Hz, H-7), 4.18 (dd,  $J = 2.5, 13$  Hz, H-8b), 3.74 (dd,  $J = 9.5, 13$  Hz, H-8a), 1.82 (s, H9)\* (\* indicates signal was partially suppressed), 1.65 (s, H-10); HPLC-NMR ( $^{13}\text{C}$ , 125 MHz), as detailed in the *Secondary Metabolite Profiling of P. angustum Using Stop-Flow HPLC-NMR Analysis* section obtained from the WET-2D HSQC NMR experiment ( $\delta$ , ppm): 134.0 (d, C5), 133.2 (t, C1), 63.5 (d, C7), 48.0 (t, C8), 27.9 (q, C10), all other carbons not observed.

HPLC-NMR assignment of minor analogue isoplocamenone (**5**) from stop-flow HPLC-NMR: HPLC-NMR ( $^1\text{H}$ , 500 MHz, as detailed in the *Results and Discussion*,  $\delta$ , ppm): 6.78 (s, H-5), 5.93 (s, H-1b), 5.80 (s, H-1a), 4.85 (dd,  $J = 2.0, 9.5$  Hz, H-7), 4.27 (dd,  $J = 2.0, 12.5$  Hz, H-8b), 2.06 (s, H10), 1.92 (s, H-9)\* (\* indicates signal was partially suppressed), H-8a suppressed.

Off-line NMR data of isoplocamenone (**5**) [(*E*)-7-Bromo-4,6,8-trichloro-2,6-dimethylocta-1,4-dien-3-one];  $^1\text{H}$  NMR (500 MHz,  $\text{CDCl}_3$ ,  $\delta$ , ppm): 6.70 (s, H-5), 5.92 (s, H-1b), 5.86 (s, H-1a), 4.85 (dd,  $J = 3.0, 9.0$  Hz, H-7), 4.32 (dd,  $J = 3.0, 12.0$  Hz, H-8b), 3.82 (dd,  $J = 9.0, 12.0$  Hz, H-8a), 2.03 (s, H9), 2.00 (s, H-10);  $^{13}\text{C}$  NMR (obtained from gHSQCAD and gHMBC NMR experiments,  $\text{CDCl}_3$ , ppm): 192.4 (s, C3) 144.2 (s, C2), 139.5 (d, C5), 133.7 (s, C4), 127.8 (t, C1), 69.8 (s, C6), 59.5 (d, C7), 45.6 (t, C8), 26.2 (q, C10), 18.1 (q, C9).
